# Supplementary material for: Robot-Mediated Interviews - How Effective Is a Humanoid Robot as a Tool for Interviewing Young Children?
Source: PLoS One. 2013 Mar 22;8(3):e59448. doi: 10.1371/journal.pone.0059448 (PMC3606117; doi:10.1371/journal.pone.0059448)
Supplement: Figure S2 — Questionnaire. (PDF) [file pone.0059448.s002.pdf]

Talking to KASPAR was?

---

|             |   |   |   |                  |
|-------------|---|---|---|------------------|
| 1           | 2 | 3 | 4 | 5                |
| Very Boring |   |   |   | Very Interesting |

---

|           |   |   |   |           |
|-----------|---|---|---|-----------|
| 1         | 2 | 3 | 4 | 5         |
| Very Hard |   |   |   | Very Easy |

---

|        |   |   |   |     |
|--------|---|---|---|-----|
| 1      | 2 | 3 | 4 | 5   |
| No Fun |   |   |   | Fun |

---

|                    |   |   |   |            |
|--------------------|---|---|---|------------|
| 1                  | 2 | 3 | 4 | 5          |
| Taking a long time |   |   |   | Very quick |
